# Supplementary material for: Characterization of Rare Genomic Structural Variants Across 2,981 Genomes Reveals Significant Involvements in Recessive Conditions
Source: Research Square preprint supplement (doi:10.21203/rs.3.rs-7097535/v1), 2025-07-29
Supplement: Supplementary file 3 [file 823e537452ff4d90cfec10db.docx]

**Table 1. Performance of exonic deletions and duplications identification by five callers including SCARD**

| ID | Description^ | Delly | Smoove | Manta | Lumpy | SCARD | Coordinates (GRCh38)* | Size* |
| --- | --- | --- | --- | --- | --- | --- | --- | --- |
| 1 | *DNAAF6* (NM_173494.2: Exon 7) hem del | Y | N | Y | Y | Y | chrX:107242214-107243992 | 1.78kb |
| 2 | *DNMT3A* (NM_022552.5: Exon 23) het del | N | N | Y | Y | Y | chr2:25230006-25230502 | 496bp |
| 3 | *CFAP61* (NM_015585.4: Exon 9) het del | Y | Y | Y | Y | Y | chr20:20125606-20156772 | 31.16kb |
| 4 | *SYNE2* (NM_015180.6: Exon 20 and 21) het del | Y | Y | Y | Y | Y | chr14:63987529-63991409 | 3.88kb |
| 5 | *ARPC1B* (NM_005720.4: Exon 2) het del | Y | N | Y | Y | Y | chr7:99385102 -99385938 | 836bp |
| 6 | *PON1* (NM_000446.7: Exon 8) het del | Y | N | Y | Y | Y | chr7:95301469-95302646 | 1.17kb |
| 7 | *SOX10* (NM_006941.4: Exon 3) het del | Y | N | Y | Y | Y | chr22:37975440-37980125 | 4.68kb |
| 8 | *GNPTAB* (NM_024312.5: Exon 18) het del | Y | N | Y | Y | Y | chr12:101755561-101757574 | 2.01kb |
| 9 | *HGSNAT* (NM_001363228.2: Exon 3 and 4) het del | Y | N | Y | Y | Y | chr8:43155721-43160067 | 4.35kb |

*The coordinates and sizes were reported by SCARD; $SCARD reported the variant by using read-depth difference algorithm only. ^het, hom, hem refer to heterozygous, homozygous and hemizygous deletion, respectively. Del and dup refer to deletion and duplication, respectively.

**Continued Table 1. Performance of exonic deletions and duplications identification by 5 callers including SCARD**

| ID | Description | Delly | Smoove | Manta | Lumpy | SCARD | Coordinates (GRCh38)* | Size* |
| --- | --- | --- | --- | --- | --- | --- | --- | --- |
| 10 | *MED13L* (NM_015335.5: Exon 2) het del | N | N | N | N | Y$ | chr12:116237490 -116240329 | 2.84kb |
| 11 | *PIEZO1* (NM_001142864.4: Exon 2) het del | Y | N | N | Y | Y | chr16:88749124-88750047 | 923bp |
| 12 | *INSR* (NM_000208.4: Exon 14) het del | Y | N | N | Y | Y | chr19:7131002-7139321 | 8.32kb |
| 13 | *EFCAB2* (NM_032328.4: Exon 3) dup | Y | Y | Y | Y | Y | chr1:245009704-245024832 | 15.13kb |
| 14 | *NDUFAF1* (NM_016013.4: Exon 1-3) dup | Y | Y | Y | Y | Y | chr15:41390532-41411950 | 21.41kb |
| 15 | *OLR1* (NM_002543.4: Exon 4-6) dup | Y | Y | Y | Y | Y | chr12:10157586-10165355 | 7.77kb |
| 16 | *LHX3* (NM_001363746.1: Exon 6) het del | N | N | N | N | Y$ | chr9:136196392-136198636 | 2.24kb |
| 17 | *METTL17* (NM_022734.3: Exon 4-6) dup | Y | Y | Y | Y | Y$ | chr14:20990998-20993511 | 2.51kb |
| 18 | *NSUN7* (Exon 1 and 2) hom del | N | N | N | N | Y$ | chr4:40732990-40757046 | 24.06kb |

*The coordinates and sizes were reported by SCARD; $SCARD reported the variant by using read-depth difference algorithm only. ^het, hom, hem refer to heterozygous, homozygous and hemizygous deletion, respectively. Del and dup refer to deletion and duplication, respectively.
